# Supplementary material
Source: publisher figshare collection journal article supplement (https://acs.figshare.com/ndownloader/files/17428262)
Supplement: Supplementary file 1 [file 17428262]

## SUPPORTING INFORMATION

# Targeted Development of Sustainable Green Catalysts for Oxidation of Alcohols *via* Tungstate-Decorated Multifunctional Amphiphilic Carbon Quantum Dots

Masoumeh Mohammadi,<sup>§</sup> Aram Rezaei,<sup>\*‡</sup> Ardeshir Khazaei,<sup>\*§</sup> Shu Xuwei<sup>ϕ</sup> and Zheng Huajun<sup>ϕ</sup>

<sup>§</sup> Faculty of Chemistry, Bu-Ali Sina University, Hamedan P. O. Box 38695-65178, Iran

<sup>‡</sup> Nano Drug Delivery Research Center, Health Technology Institute, Kermanshah University of Medical Sciences, Kermanshah P. O. Box 67145-1673, Iran

<sup>ϕ</sup> Department of Applied Chemistry, Zhejiang University of Technology, Hangzhou P. O. Box 310032, China

\*Corresponding authors:

Phone office: +98 833 4276489 E. Mail: [aram.rezaei@gmail.com](mailto:aram.rezaei@gmail.com), [aram.rezaei@kums.ac.ir](mailto:aram.rezaei@kums.ac.ir)

Phone office: +98 811 8282807 E. Mail: [a\\_khazaei@basu.ac.ir](mailto:a_khazaei@basu.ac.ir)

### Detailed list of CONTENTS of the supporting information

| List of contents                        | Page |
|-----------------------------------------|------|
| Title, author's name, address and table | S-1  |
| Figure S 1                              | S-2  |
| Table S 1                               | S-2  |
| Figure S 2                              | S-3  |
| Figure S 3                              | S-4  |
| Figure S 4                              | S-5  |
| Figure S 5                              | S-6  |
| Figure S 6                              | S-7  |
| Figure S 7                              | S-8  |

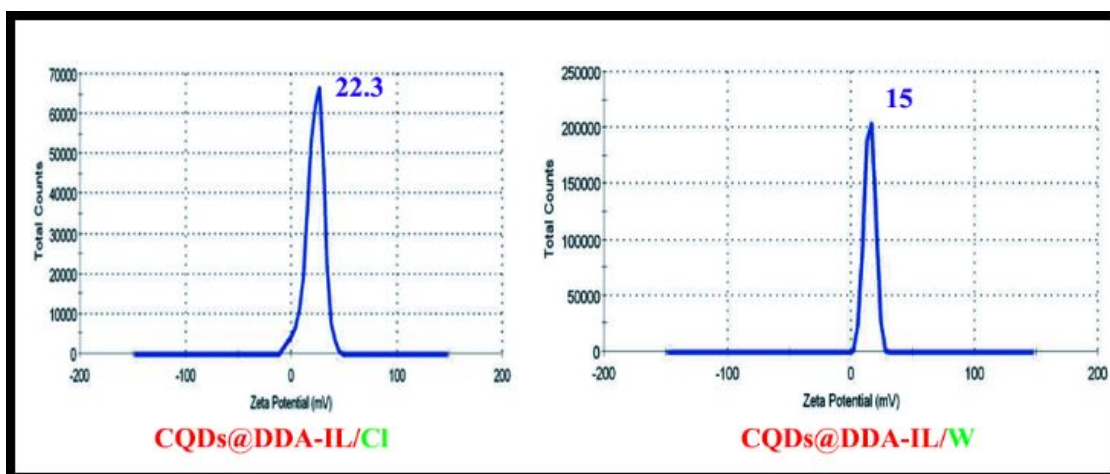

**Figure S 1.** Zeta potential distribution graph of the CQDs@ DDA-IL/Cl and CQDs@DDA-IL/W.

|           | wt % results<br>of EDS analysis |               | wt% results<br>of XPS analysis |
|-----------|---------------------------------|---------------|--------------------------------|
| Elements  | CQDs@DDA-IL/Cl                  | CQDs@DDA-IL/W | CQDs@DDA-IL/W                  |
| <b>C</b>  | 49.46                           | 44.85         | 63.24                          |
| <b>O</b>  | 23.98                           | 30.17         | 21                             |
| <b>N</b>  | 20.26                           | 18.91         | 12.36                          |
| <b>Na</b> | 0.27                            | 0.6           | 0.34                           |
| <b>Cl</b> | 6.03                            | 0.54          | —                              |
| <b>W</b>  | —                               | 4.93          | 1.17                           |
| <b>Si</b> | —                               | —             | 1.89                           |

**Table S 1.** wt% results of EDS and XPS analyses.

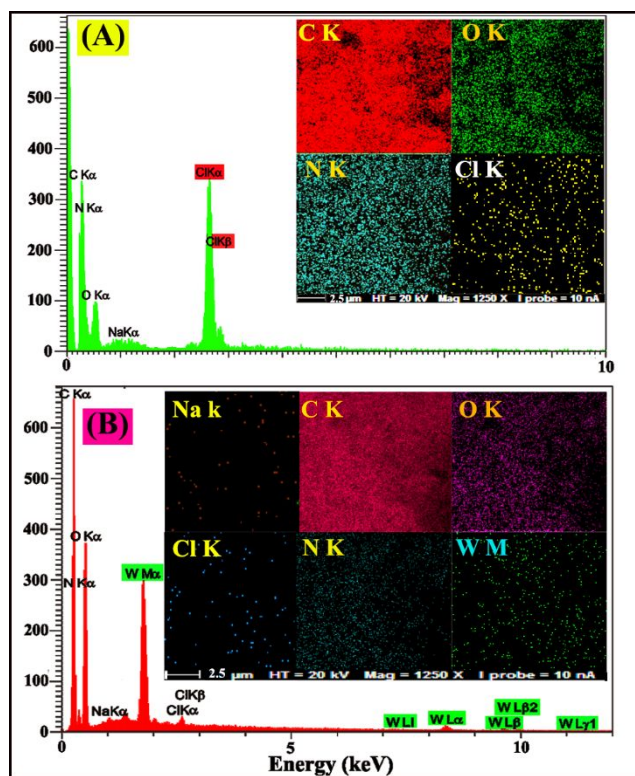

**Figure S 2.** EDS profile and corresponding elemental mapping images of (A) the CQDs@DDA-IL/Cl and (B) the CQDs@DDA-IL/W.

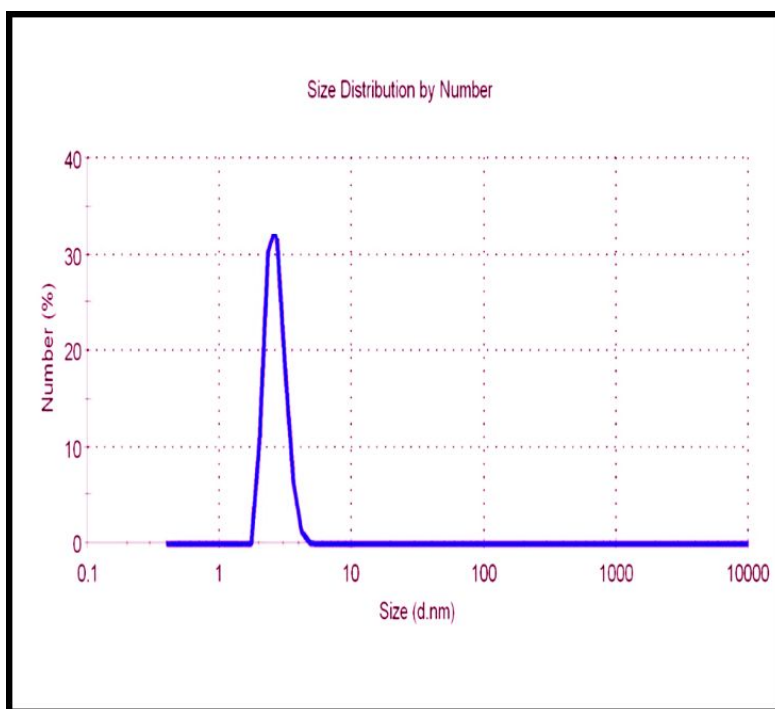

**Figure S 3.** Size distribution graph of the CQDs@ DDA-IL/W aqueous solution.

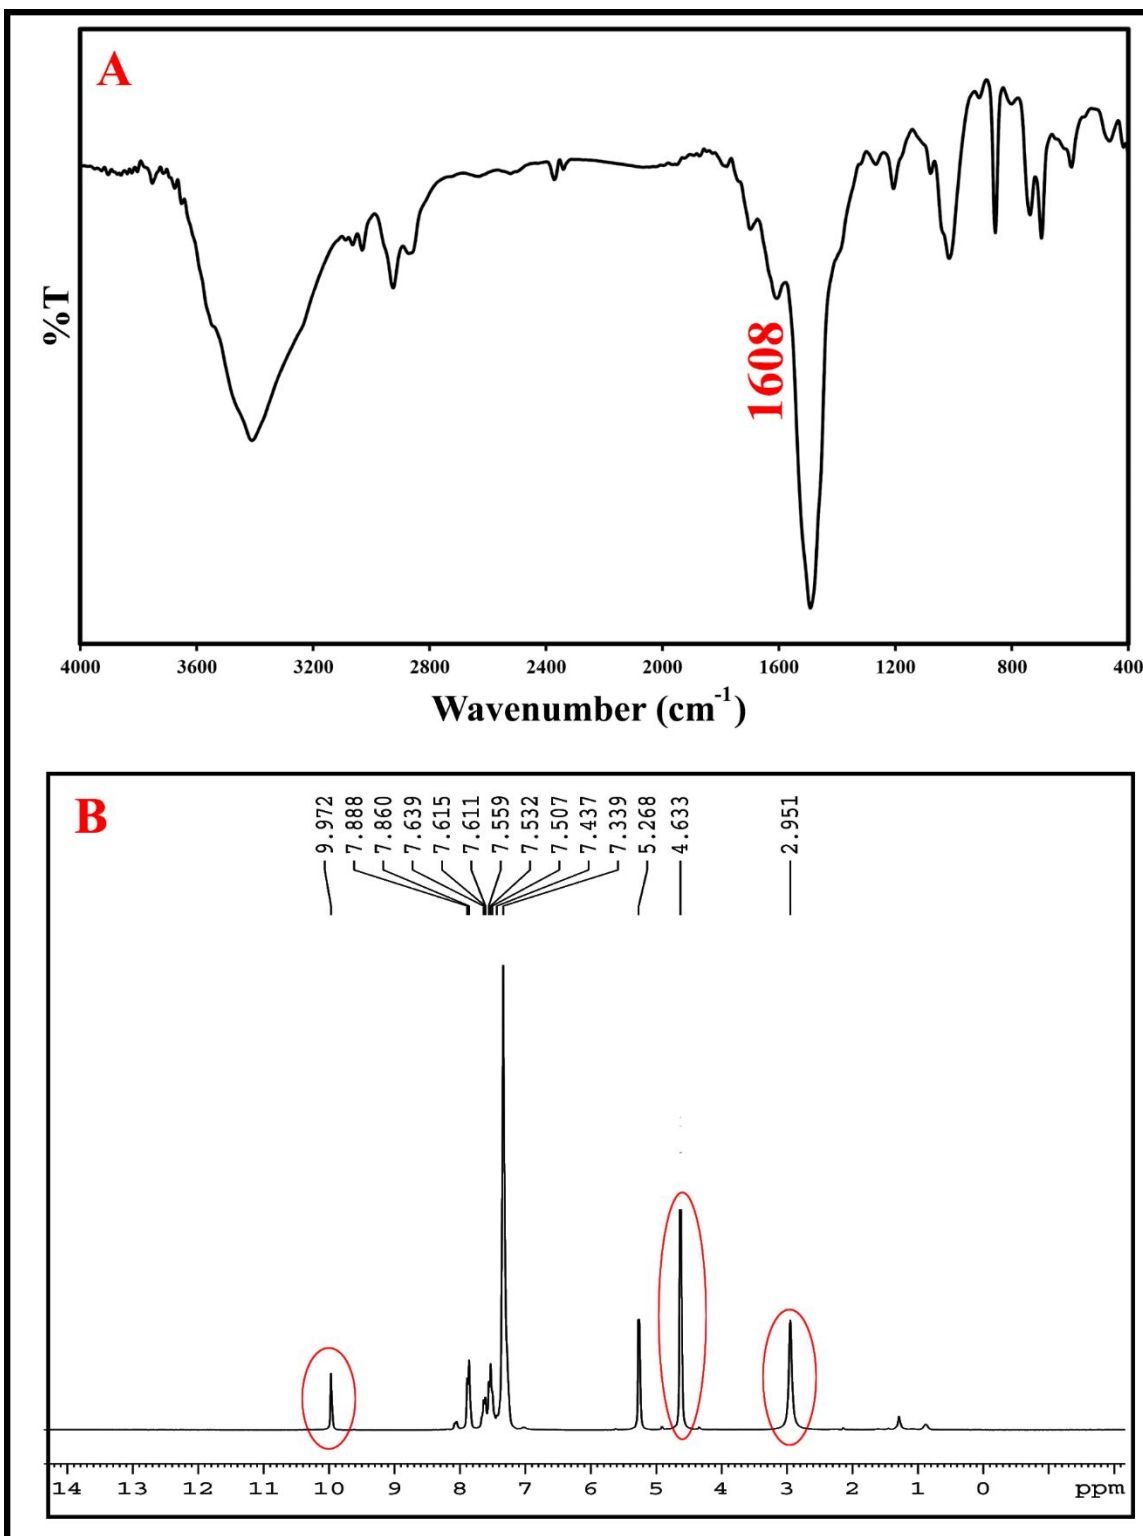

**Figure S 4.** (A) FT-IR spectrum and (B) <sup>1</sup>H NMR spectrum of the extracted reaction mixture of the benzyl alcohol oxidation in the CDCl<sub>3</sub>.

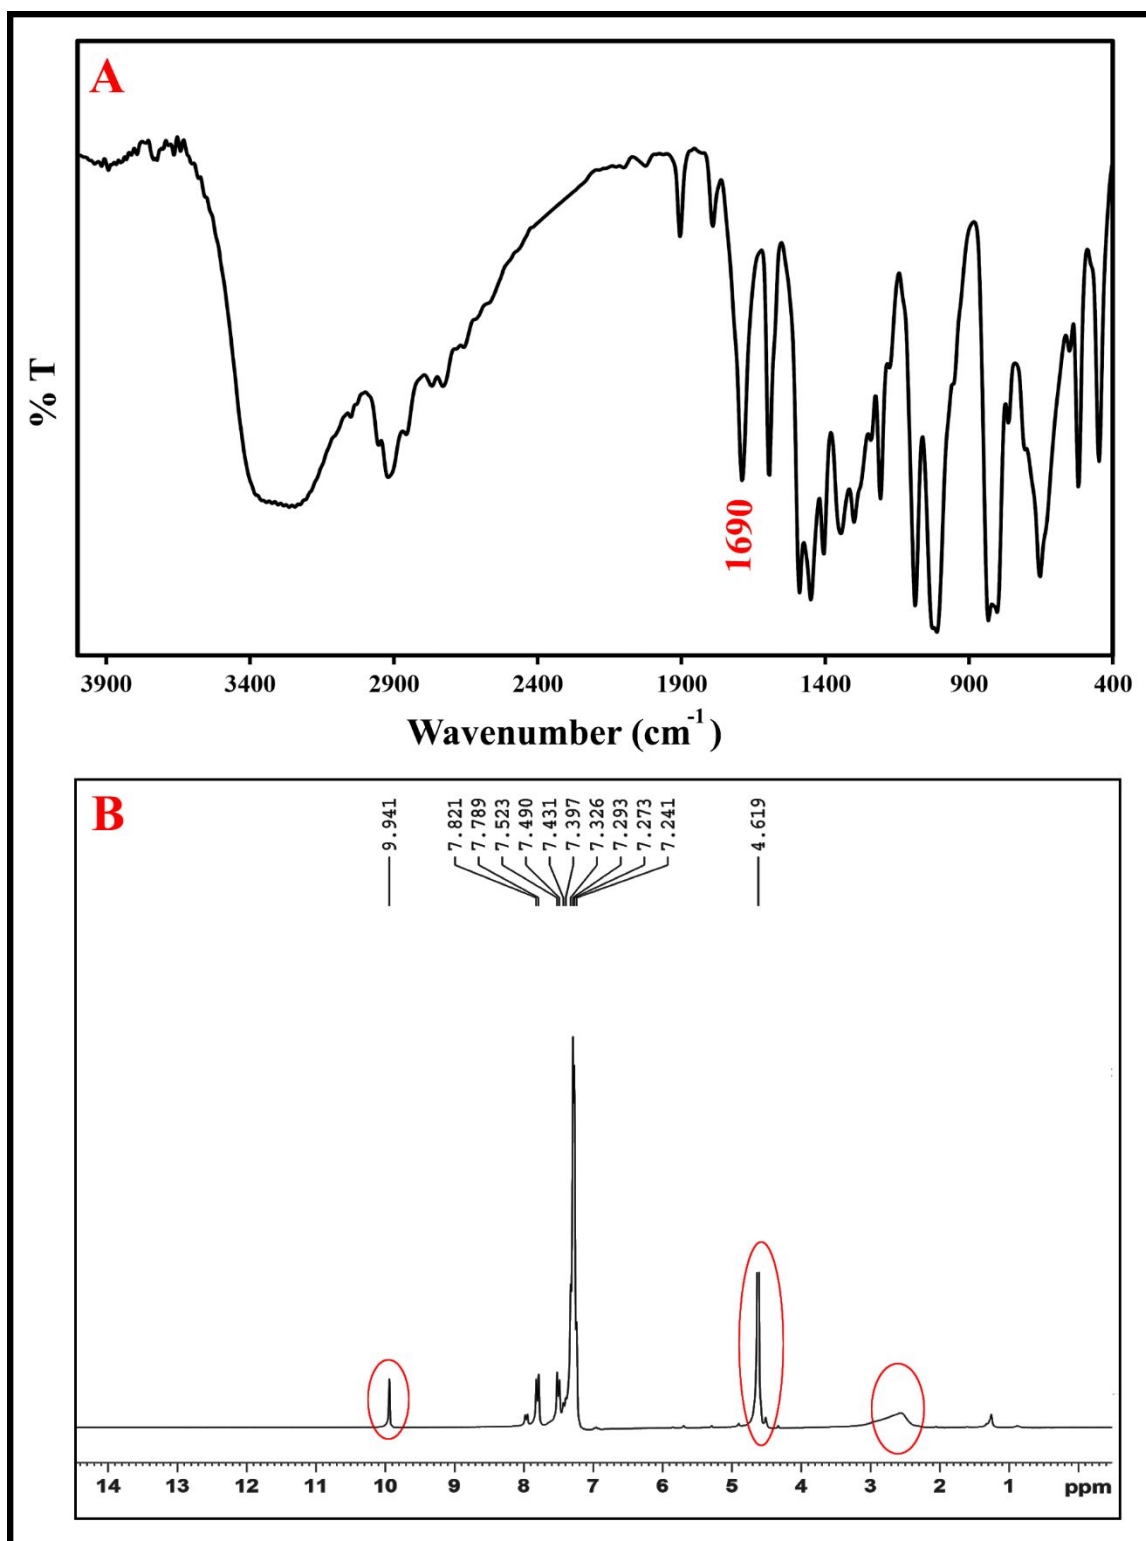

**Figure S 5.** (A) FT-IR spectrum and (B)  $^1\text{H}$  NMR spectrum of the extracted reaction mixture of the 4-chlorobenzyl alcohol oxidation in the  $\text{CDCl}_3$ .

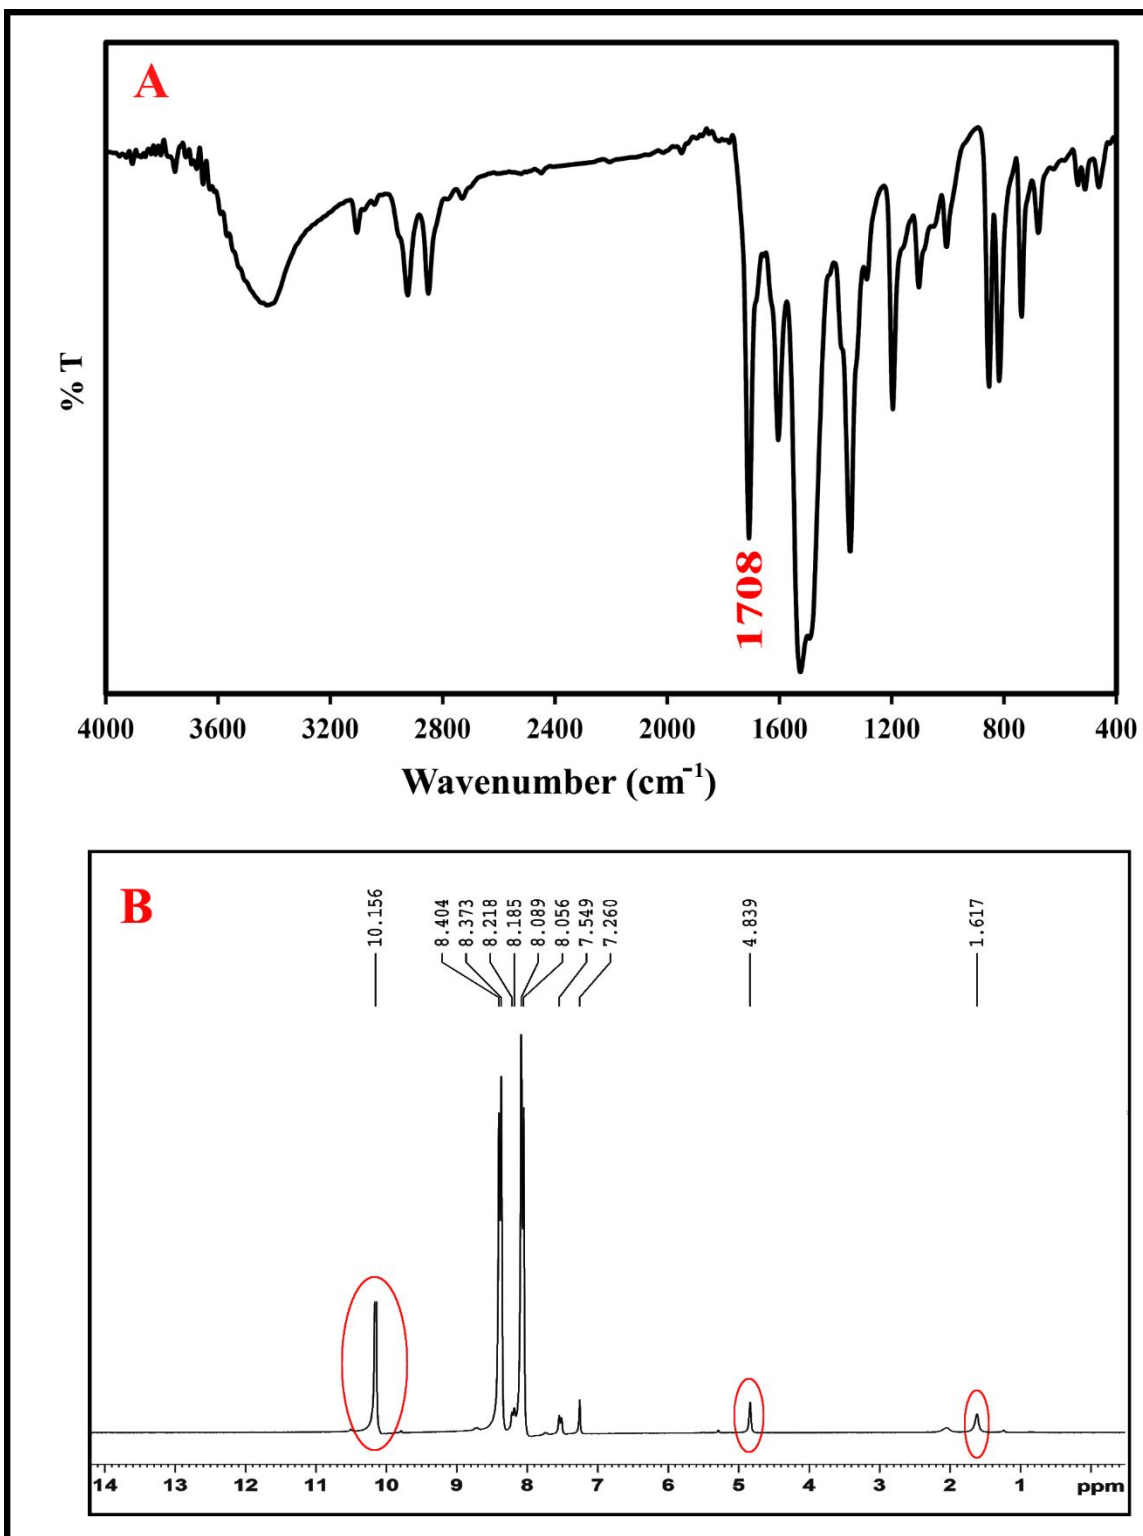

**Figure S 6.** (A) FT-IR spectrum and (B)  $^1\text{H}$  NMR spectrum of the extracted reaction mixture of the 4-nitrobenzyl alcohol oxidation in the  $\text{CDCl}_3$ .

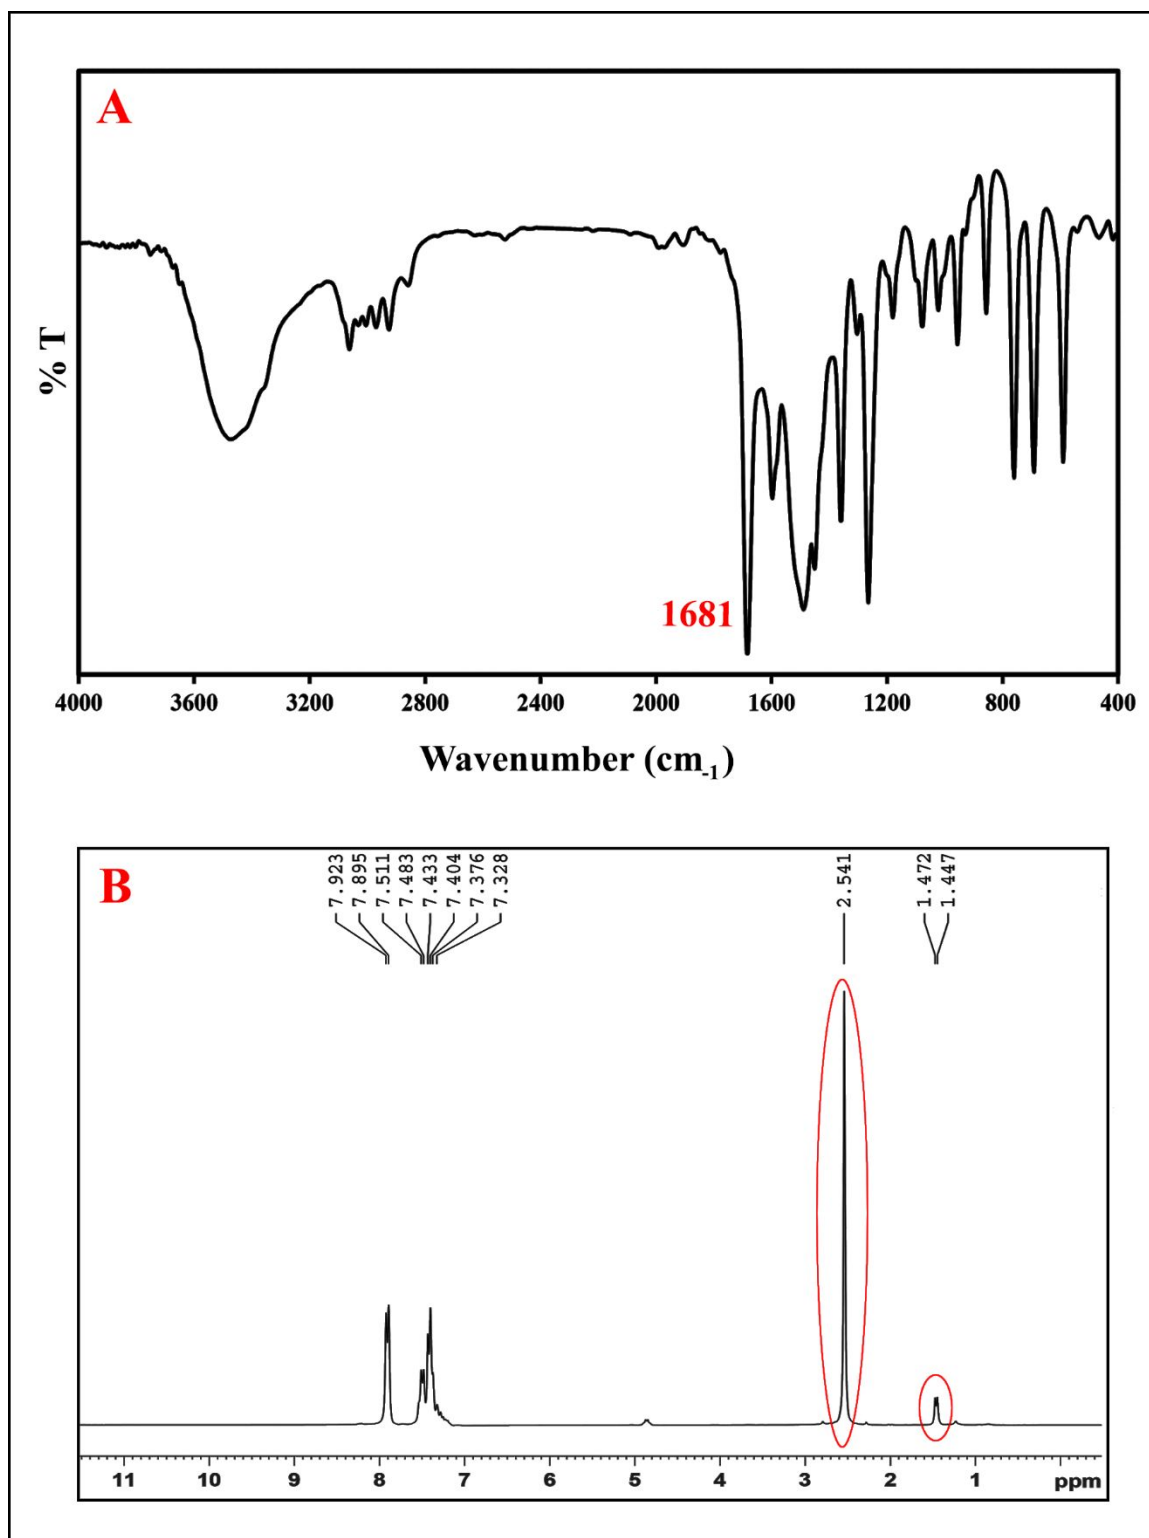

**Figure S 7.** (A) FT-IR spectrum and (B) <sup>1</sup>H NMR spectrum of the extracted reaction mixture of the 1-phenylethanol oxidation in the CDCl<sub>3</sub>.
